# Supplementary material for: Issues of under-representation in quantitative DNA metabarcoding weaken the inference about diet of the tundra vole Microtus oeconomus
Source: PeerJ journal article supplement (doi:10.7717/peerj.11936), 2021-08-26

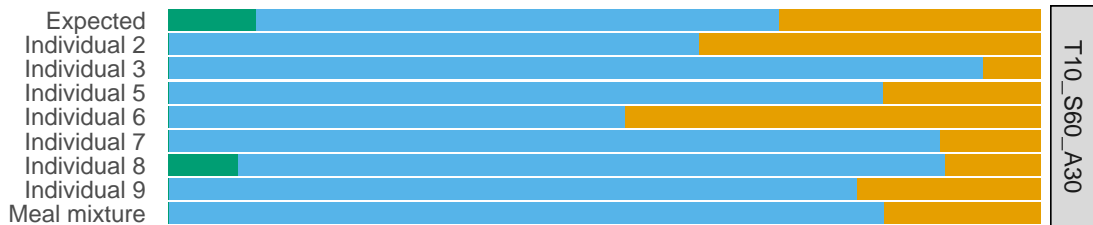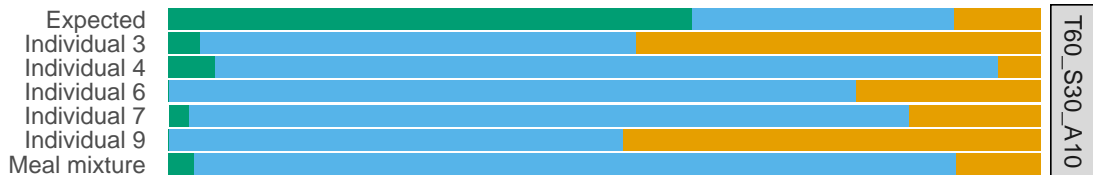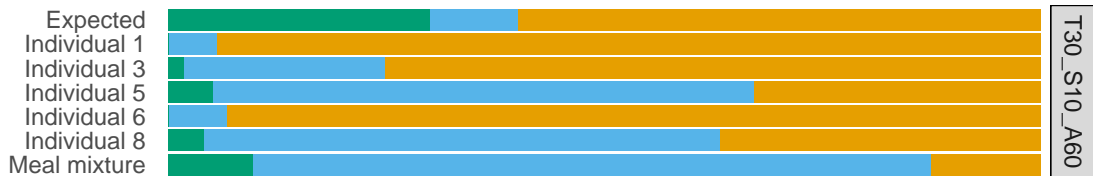

Sample compositions

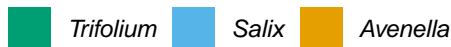

Supplement: Supplemental_Figure_S1.pdf [file Supplemental_Figure_S1.pdf]
